# Supplementary material for: Molecular modeling studies of 1,2,4-triazine derivatives as novel h-DAAO inhibitors by 3D-QSAR, docking and dynamics simulations
Source: Royal Society of Chemistry journal article supplement (doi:10.1039/c8ra00094h), 2018-01-01
Supplement: c8ra00094h1.pdf [file c8ra00094h1.pdf]

## Supplementary material

### Molecular modeling studies of 1,2,4-triazine derivatives as novel h-DAAO inhibitors by 3D-QSAR, docking and dynamics simulations

Ping Ping Qian, Shuai Wang, Kai Rui Feng and Yu Jie Ren\*

\*School of Chemical and Environmental Engineering, Shanghai Institute of Technology, Shanghai 201418, China

E-mail: clab@sit.edu.cn

**Table 1S** Uni-column statistics of the training and test sets for the 3D-QSAR model study

| Data set | Inhibitory potency | Average | Maximum | Minimum | Standard Deviation | Sum     |
|----------|--------------------|---------|---------|---------|--------------------|---------|
| Training | pIC <sub>50</sub>  | 6.717   | 7.398   | 4.000   | 0.704              | 208.236 |
| Test     | pIC <sub>50</sub>  | 6.153   | 7.301   | 4.398   | 1.138              | 36.917  |

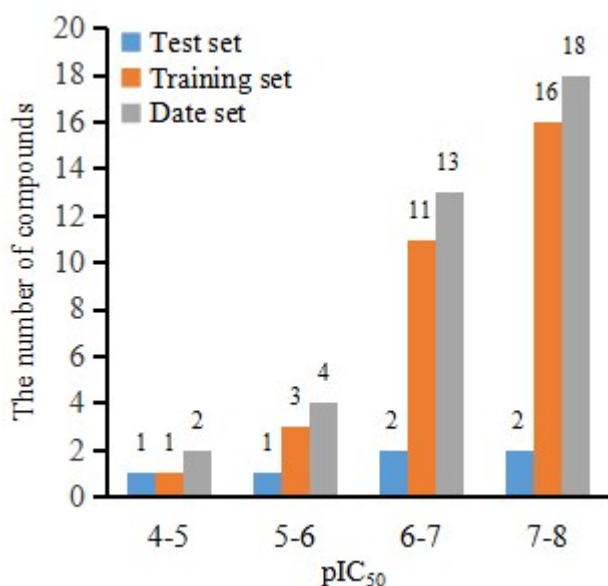

**Fig. 1S** Histogram of biological data distribution statistics in the 3D-QSAR analysis

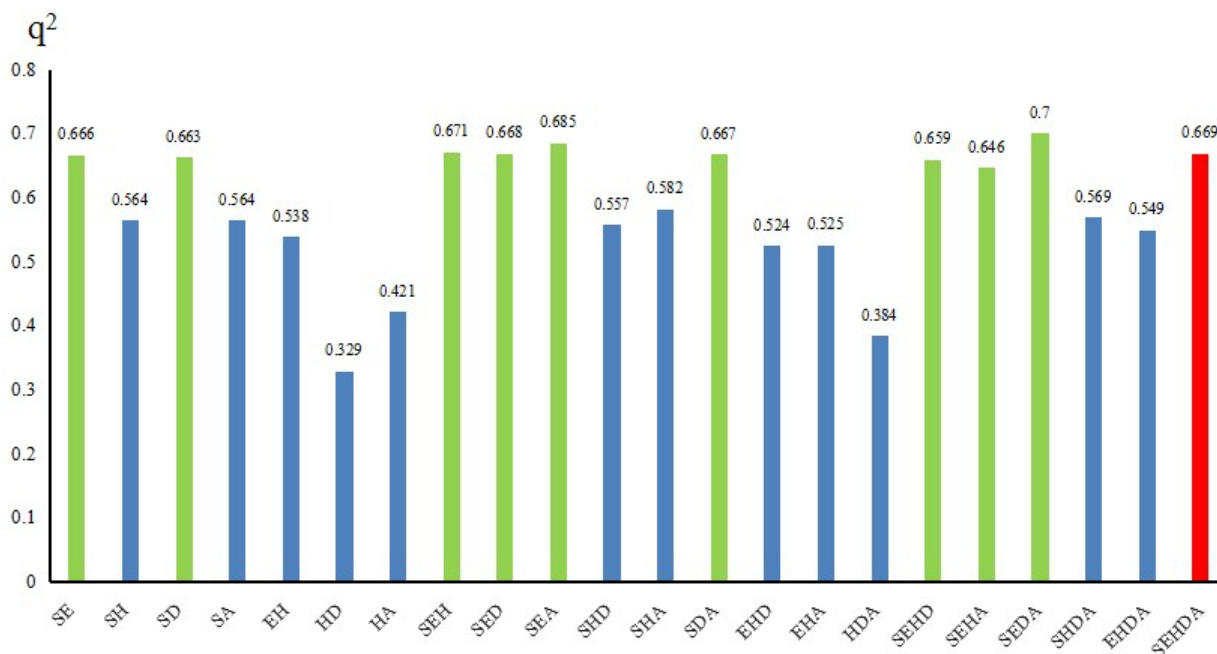

**Fig. 2S** Efficient color histogram indexing for the  $q^2$  values of probable field combinations in CoMSIA analysis. (green: combinations with higher  $q^2$  values, red: the best field combination).

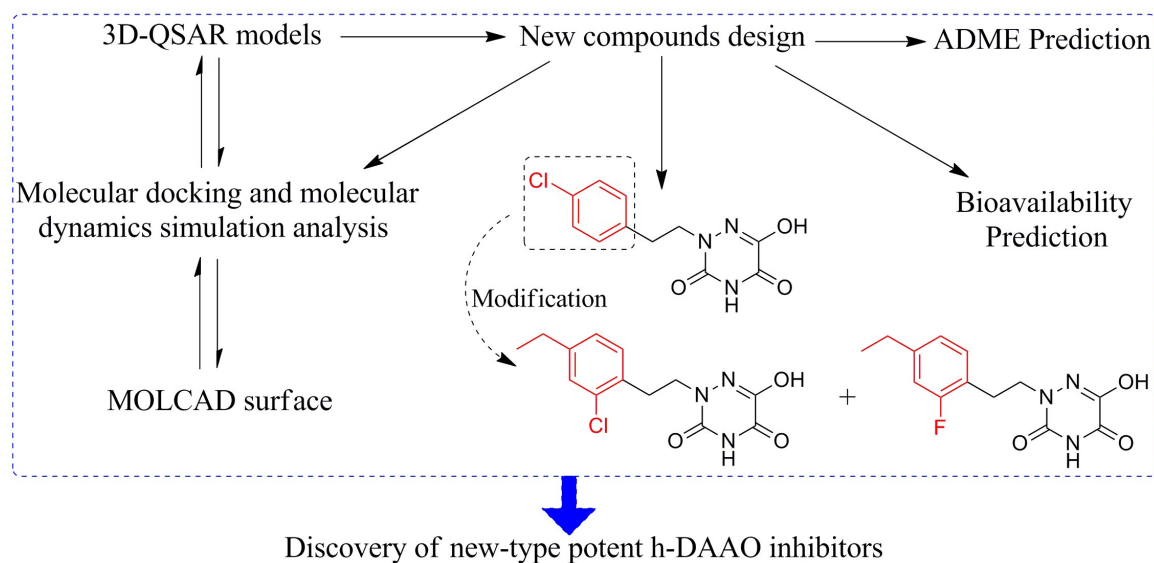

**Fig. 3S** Basic flowchart of research programme.

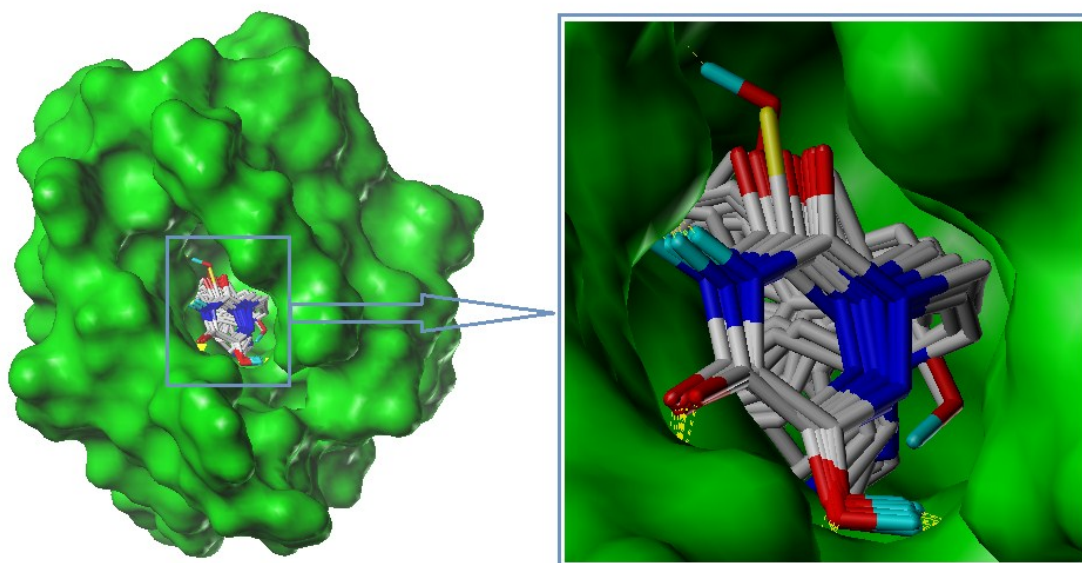

**Fig. 4S** Docking results of all compounds and surface of the binding site. (yellow lines: hydrogen bonds)

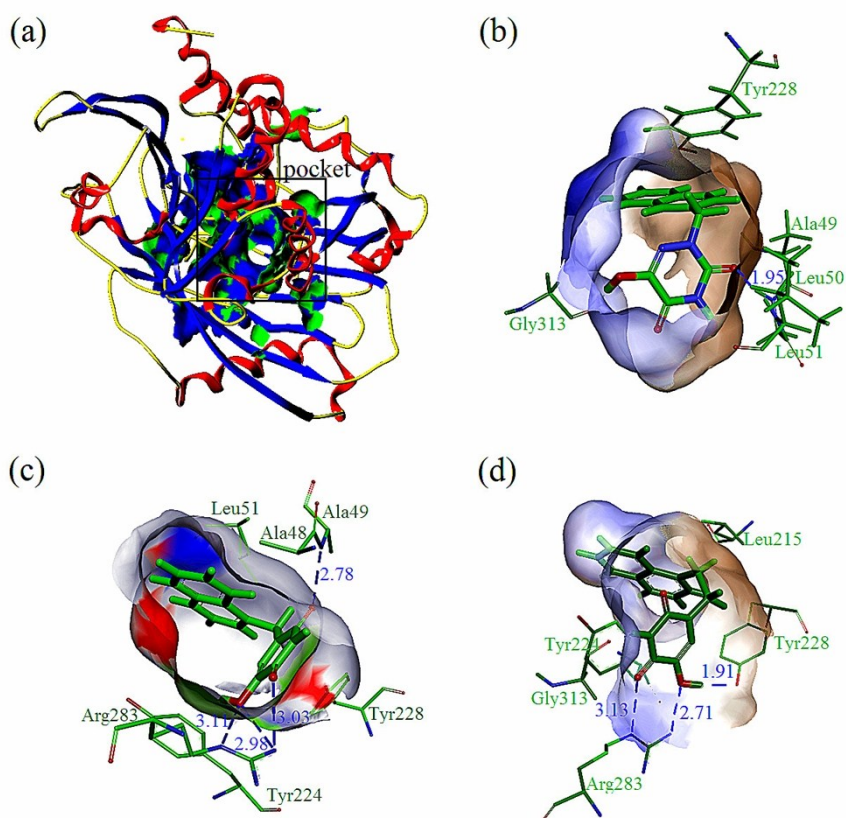

**Fig. 5S** The binding pocket (a), docking results and surface of compound **4** (b), **5** (c) and **6** (d). (blue lines: hydrogen bonds)

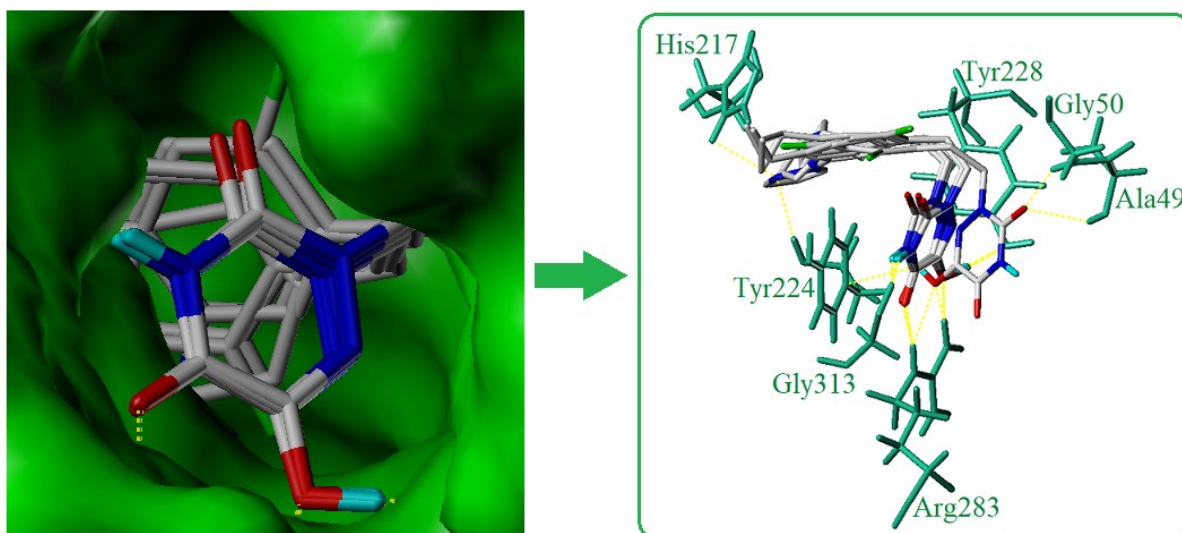

**Fig. 6S** Docking results of all designed compounds into the binding site of protein 3W4K. (yellow lines: hydrogen bonds)

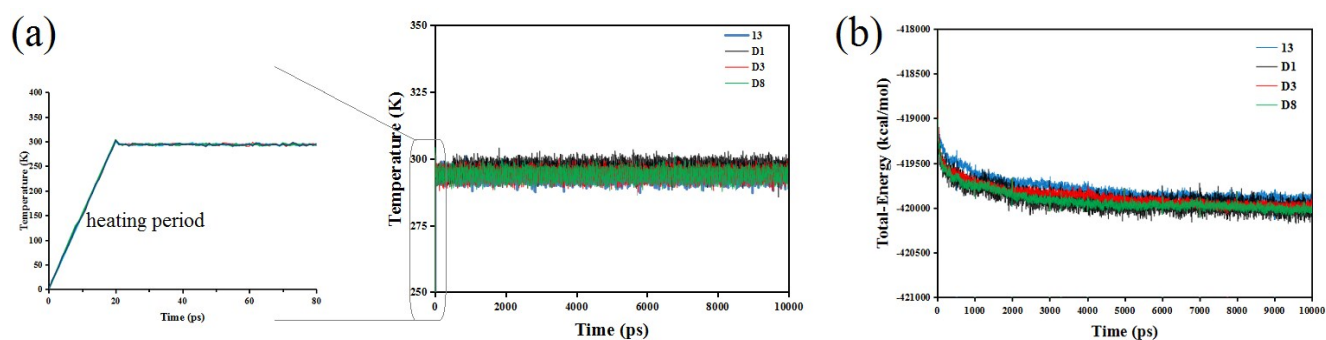

**Fig. 7S** The total-energy (a) and temperature (b) of the inhibitor-protein complexes versus dynamics time.

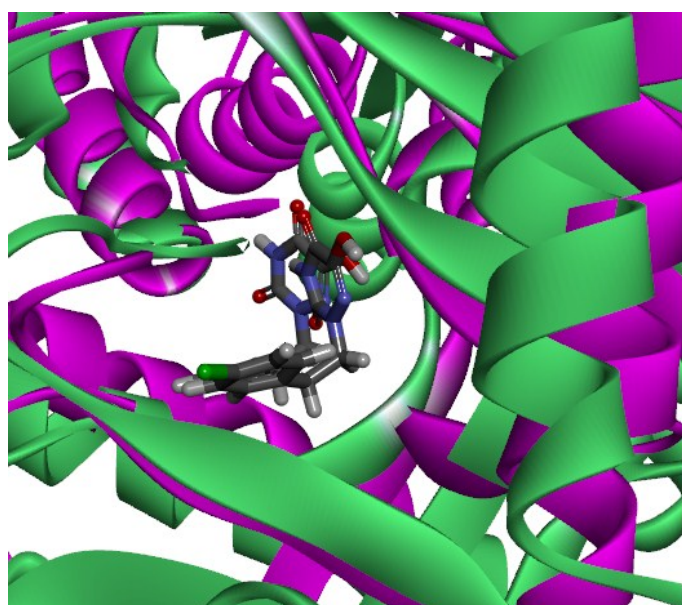

**Fig. 8S** Structural comparison between original structure (purple) and dynamics equilibrium structure (green) of 13-3W4K.

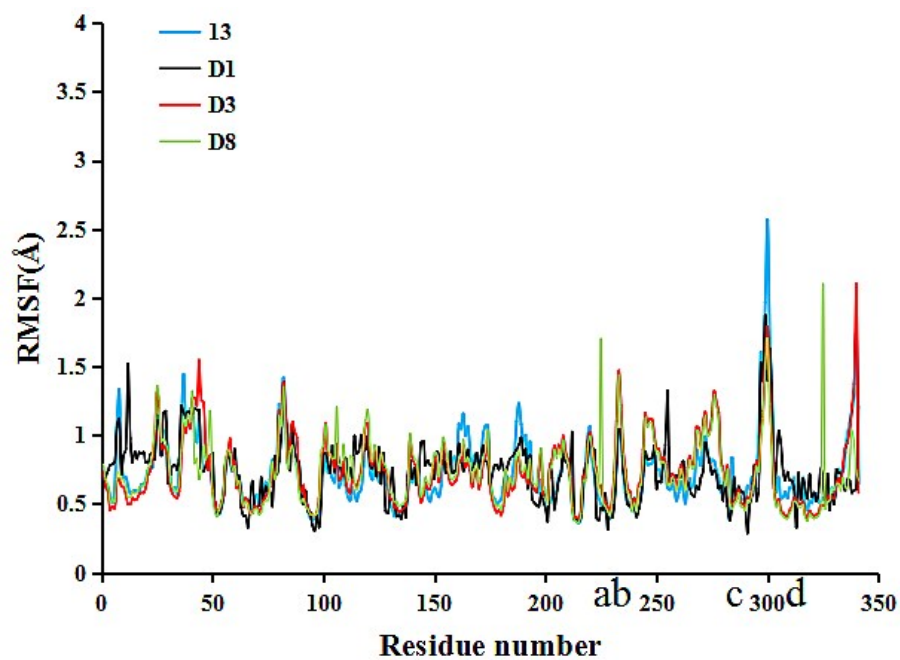

**Fig. 9S** Root-mean-square fluctuation (RMSF) the ligand-3W4K complexes versus residue number. (a: Tyr224; b: Tyr228; c: Arg283; d: Gly313)

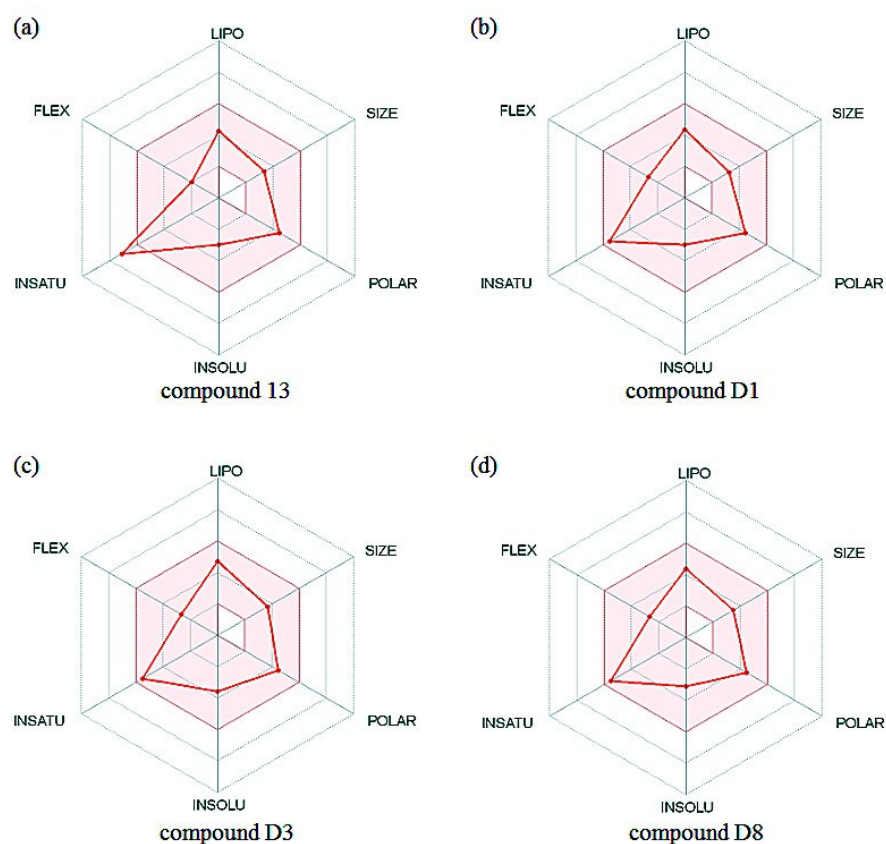

**Fig. 10S** The bioavailability radars for compounds 13 (a), D1 (b), D3 (c) and D8 (d).

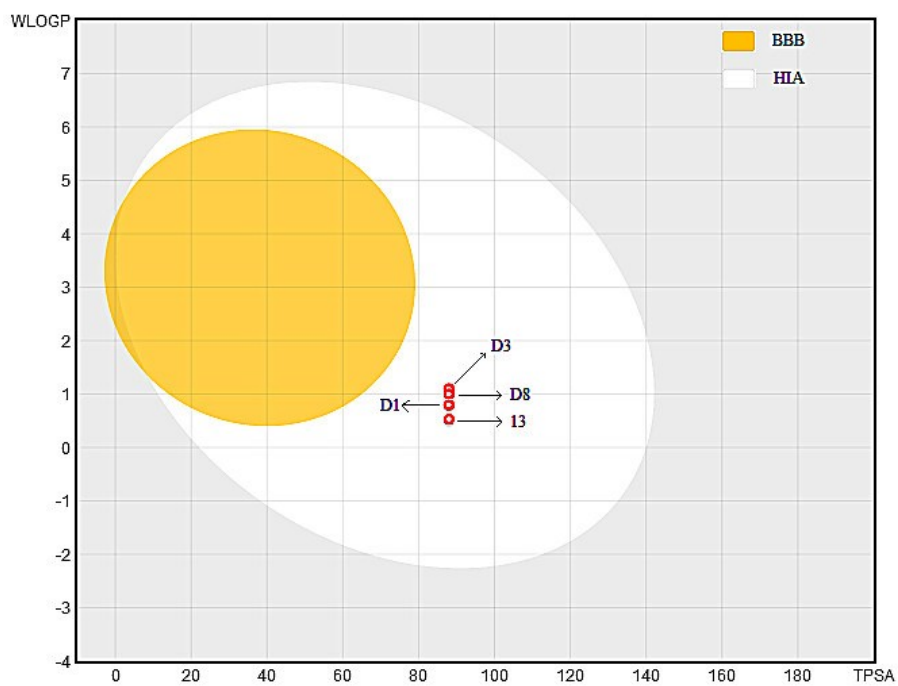

**Fig. 11S** The BOILED-Egg model for intuitive assessment of HIV and BBB through the position of the representative compounds.
